# Supplementary material for: Delirium prevalence and incidence in acutely admitted older patients: an observational cohort study
Source: Research Square preprint supplement (doi:10.21203/rs.3.rs-7184588/v1), 2025-08-12
Supplement: Supplementary file [file cc0ac8f73c37c695a49e2b3e.pdf]

**Table 1.** Diagnostic algorithm for DSM-V delirium

| DSM-V criteria                                                                                                                                                                                                                                | Test to be performed or information needed                                                                                                                                                                                                                                                                                                                     | DSM-V criteria fulfilled? |    |
|-----------------------------------------------------------------------------------------------------------------------------------------------------------------------------------------------------------------------------------------------|----------------------------------------------------------------------------------------------------------------------------------------------------------------------------------------------------------------------------------------------------------------------------------------------------------------------------------------------------------------|---------------------------|----|
|                                                                                                                                                                                                                                               |                                                                                                                                                                                                                                                                                                                                                                | YES                       | NO |
| A: <u>Disturbance in attention</u> (i.e., reduced ability to direct, focus, sustain, and shift attention) and <b>awareness</b> (reduced orientation to the environment).                                                                      | <p><u>TEST</u>: 4As test- Months of the year in reverse order</p> <p><b>Cut off (definition of inattention)</b>: unable to reach July.</p> <p><u>Observations (documented in medical record)</u>: Distractibility. Tendency to lose the tread in conversation. RASS. OSLA.</p>                                                                                 |                           |    |
| B: The disturbance <u>develops</u> over a <b>short period of time</b> (usually hours to a few days), represents a <b>change</b> from baseline attention and awareness and tends to <b>fluctuate</b> in severity during the course of the day. | <p>Information documented in the medical record from patients carers, nurses or doctors;</p> <p>i.e. documented changes in the patients mental state, altered consciousness, sleep-wake cycle disturbances, variability in presentation of these symptoms.</p> <p>4As test: “acute change or fluctuating course”?</p>                                          |                           |    |
| C: An <u>additional disturbance in cognition</u> (i.e. memory deficit, disorientation, language, visuospatial ability, or perception).                                                                                                        | <p><u>Information from the medical record</u>: Orientation to time, place and person. 4As test: AMT4. <b>Cut off</b> <math>\geq 2</math> mistakes or untestable.</p> <p>Any documented episodes of hallucinations/illusions, perceptual disturbances, sleep-wake cycle disturbances, memory disturbances, psychotic symptoms or psychomotor abnormalities.</p> |                           |    |

|                                                                                                                                                                                                                                                                                                                                         |                                                                                                                                                                                                |     |    |
|-----------------------------------------------------------------------------------------------------------------------------------------------------------------------------------------------------------------------------------------------------------------------------------------------------------------------------------------|------------------------------------------------------------------------------------------------------------------------------------------------------------------------------------------------|-----|----|
| D: The disturbances in criteria A and C are <b>not explained by another pre-existing, established or evolving neurodegenerative disorder</b> and do not occur in the context of a severely reduced level of arousal, such as coma.                                                                                                      | Information from history/medical record.                                                                                                                                                       |     |    |
| E: There is evidence from the history, physical examination, or laboratory findings that the disturbance is a direct <b>physiologic consequence</b> of another medical condition, substance intoxication or withdrawal (i.e. because a drug of abuse or to a medication), or exposure to a toxin or is because of multiple aetiologies. | Information from history/medical record.                                                                                                                                                       |     |    |
| <u>Conclusion:</u><br><b>Delirium</b> based on the tests and information above?                                                                                                                                                                                                                                                         | All DSM-V criteria fulfilled                                                                                                                                                                   | YES | NO |
| <b>Subsyndromal delirium</b> based on the tests and information above?                                                                                                                                                                                                                                                                  | DSM-V criteria not fulfilled, but evidence of change, in addition to any one of these: a) altered arousal, b) attentional deficits, c) other cognitive change, d) delusions or hallucinations. | YES | NO |
